# Supplementary material for: Response-Surface-Methodology-Based Increasing of the Isotropic Thermal Conductivity of Polyethylene Composites Containing Multiple Fillers
Source: MDPI journal article supplement (doi:10.3390/polym15010039), 2022-12-22
Supplement: s1 [file s1]

# Response surface methodology based increasing of the isotropic thermal conductivity of polyethylene composites containing multiple fillers – Supporting Information

## Table of contents

|                                                                           |   |
|---------------------------------------------------------------------------|---|
| S1. SEM-images of the compositions .....                                  | 1 |
| S2. ANOVA Results .....                                                   | 3 |
| S2.1. ANOVA Results for the TC FCCD .....                                 | 3 |
| S2.2. ANOVA Results for the melt viscosity FCCD .....                     | 4 |
| S3. Determination of the dominant filler for the viscosity increase ..... | 4 |
| S4. Densities used of the polymer and fillers .....                       | 4 |

## S1. SEM-images of the compositions

**Run 2**

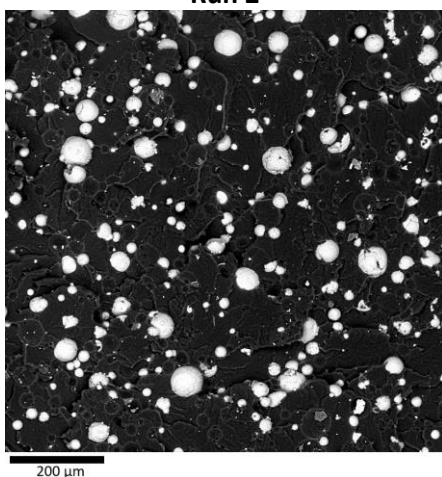

**Run 3**

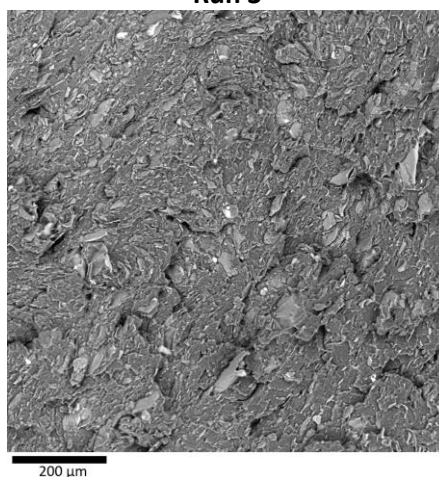

**Run 4**

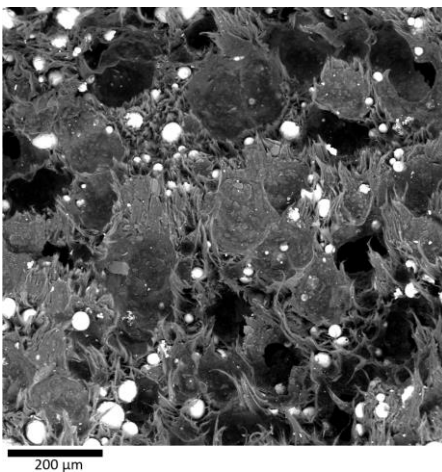

**Run 5**

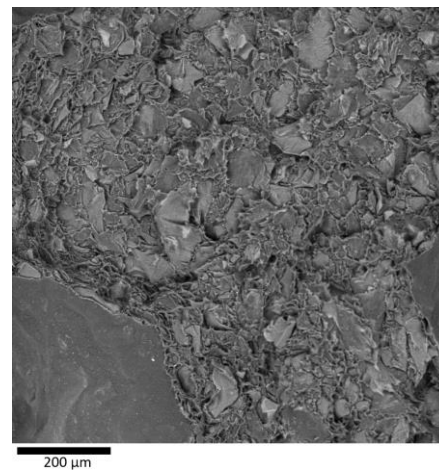

**Run 6**

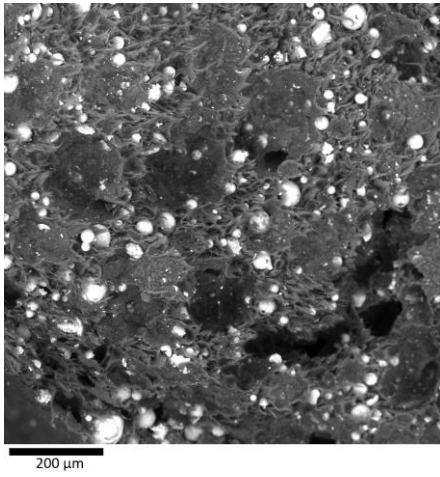

**Run 7**

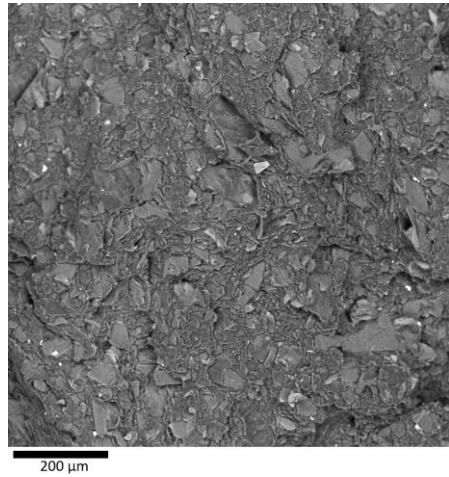

**Run 8**

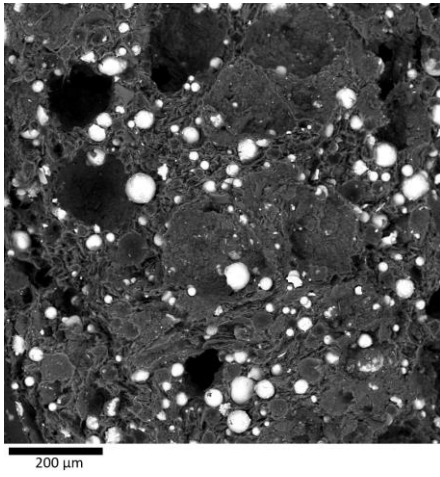

**Run 9**

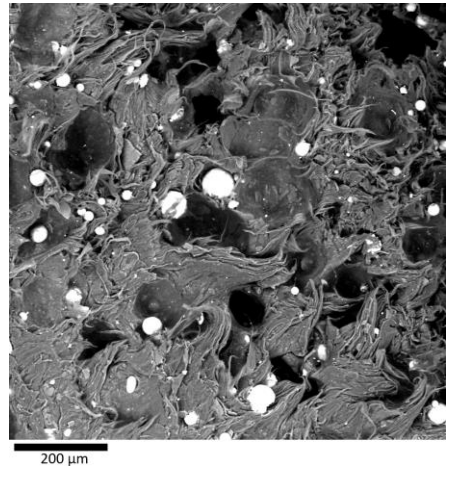

**Run 10**

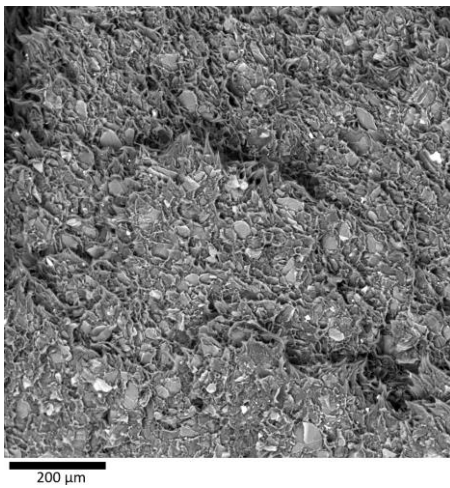

**Run 11**

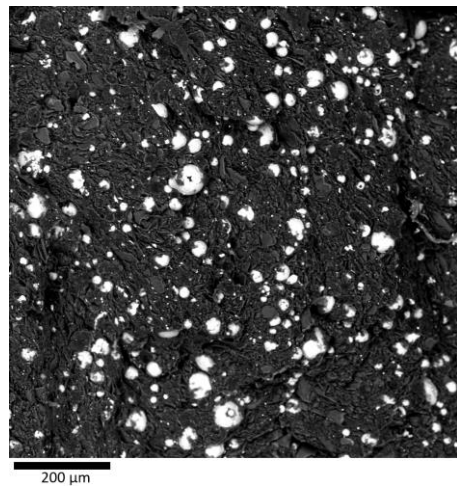

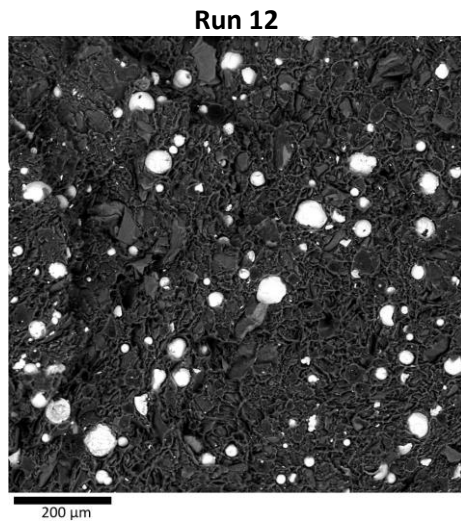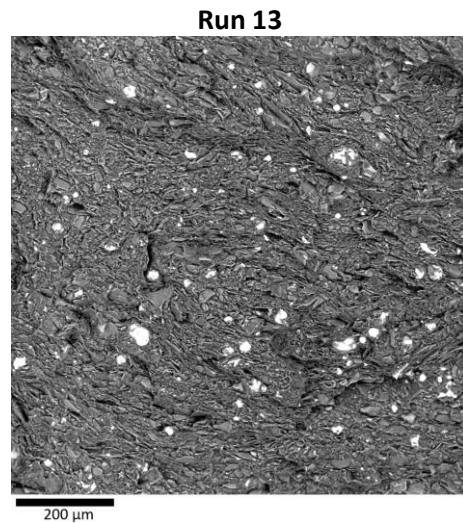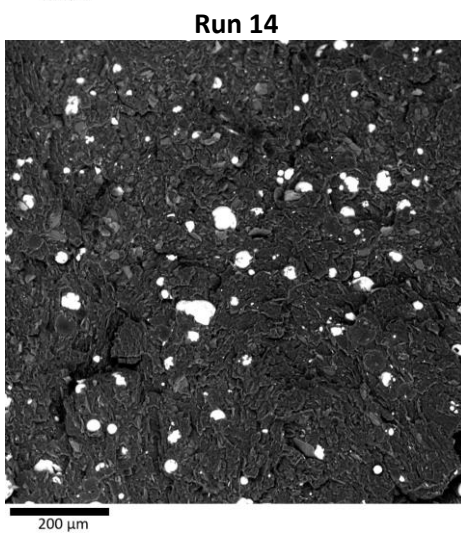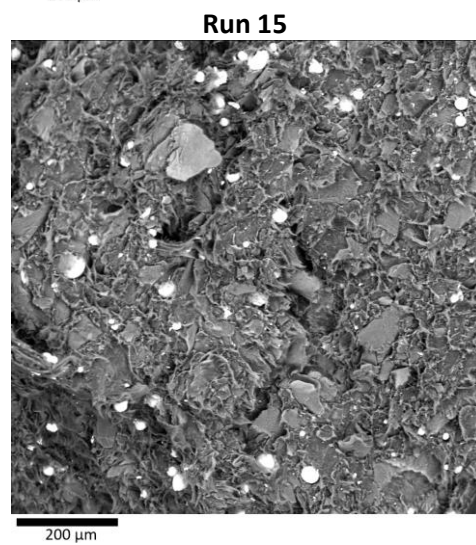

## S2. ANOVA Results

### S2.1. ANOVA Results for the TC FCCD

| Analysis of Variance |    |                |             |                    |
|----------------------|----|----------------|-------------|--------------------|
| Source               | DF | Sum of Squares | Mean Square | F Ratio            |
| Model                | 9  | 15.993274      | 1.77703     | 270.1134           |
| Error                | 7  | 0.046052       | 0.00658     | <b>Prob &gt; F</b> |
| C. Total             | 16 | 16.039326      |             | <b>&lt;.0001*</b>  |

  

| Parameter Estimates |           |           |         |                   |
|---------------------|-----------|-----------|---------|-------------------|
| Term                | Estimate  | Std Error | t Ratio | Prob> t           |
| Intercept           | 1.4016644 | 0.034707  | 40.39   | <b>&lt;.0001*</b> |
| Alumina             | 0.7081123 | 0.025649  | 27.61   | <b>&lt;.0001*</b> |
| PP44                | 0.5796794 | 0.025649  | 22.60   | <b>&lt;.0001*</b> |
| GFG75               | 0.7333924 | 0.025649  | 28.59   | <b>&lt;.0001*</b> |
| Alumina*PP44        | 0.285701  | 0.028677  | 9.96    | <b>&lt;.0001*</b> |
| Alumina*GFG75       | 0.3375624 | 0.028677  | 11.77   | <b>&lt;.0001*</b> |
| PP44*GFG75          | 0.1667296 | 0.028677  | 5.81    | <b>0.0007*</b>    |
| Alumina*Alumina     | 0.2156997 | 0.049553  | 4.35    | <b>0.0033*</b>    |
| PP44*PP44           | 0.0575522 | 0.049553  | 1.16    | 0.2835            |
| GFG75*GFG75         | 0.1186803 | 0.049553  | 2.40    | <b>0.0478*</b>    |

### S2.2. ANOVA Results for the melt viscosity FCCD

| Analysis of Variance |    |                |             |          |
|----------------------|----|----------------|-------------|----------|
| Source               | DF | Sum of Squares | Mean Square | F Ratio  |
| Model                | 9  | 254907123      | 28323014    | 45,3006  |
| Error                | 7  | 4376571        | 625224,37   | Prob > F |
| C. Total             | 16 | 259283693      |             | <,0001*  |

  

| Parameter Estimates |          |           |         |         |
|---------------------|----------|-----------|---------|---------|
| Term                | Estimate | Std Error | t Ratio | Prob> t |
| Intercept           | 12769,2  | 338,3455  | 37,74   | <,0001* |
| Al2O3               | 3820,01  | 250,0449  | 15,28   | <,0001* |
| PP44                | 937,79   | 250,0449  | 3,75    | 0,0072* |
| GFG75               | 2664,93  | 250,0449  | 10,66   | <,0001* |
| Al2O3*PP44          | 846,2    | 279,5587  | 3,03    | 0,0192* |
| Al2O3*GFG75         | 1480,55  | 279,5587  | 5,30    | 0,0011* |
| PP44*GFG75          | 256,45   | 279,5587  | 0,92    | 0,3895  |
| Al2O3*Al2O3         | 823,95   | 483,0718  | 1,71    | 0,1318  |
| PP44*PP44           | -675,25  | 483,0718  | -1,40   | 0,2049  |
| GFG75*GFG75         | 789,25   | 483,0718  | 1,63    | 0,1463  |

### S3. Determination of the dominant filler for the viscosity increase

|             | Al <sub>2</sub> O <sub>3</sub> | G   | EG  | Viscosity<br>@<br>$\dot{\gamma} = 3 \text{ s}^{-1}$<br>(Pa.s) |
|-------------|--------------------------------|-----|-----|---------------------------------------------------------------|
| m.%         | 10                             | 0   | 0   |                                                               |
| Coded level | -0,56                          | 0   | 0   | 8337                                                          |
| m.%         | 0                              | 10  | 0   |                                                               |
| Coded level | 0                              | 0,6 | 0   | 7820                                                          |
| m.%         | 0                              | 0   | 10  |                                                               |
| Coded level | 0                              | 0   | 0,6 | 9568                                                          |

### S4. Densities used of the polymer and fillers

| HDPE                     | G                       | EG                      | Al <sub>2</sub> O <sub>3</sub> | CNT                     |
|--------------------------|-------------------------|-------------------------|--------------------------------|-------------------------|
| 0.945 g.cm <sup>-3</sup> | 2.16 g.cm <sup>-3</sup> | 2.16 g.cm <sup>-3</sup> | 3.85 g.cm <sup>-3</sup>        | 1.35 g.cm <sup>-3</sup> |
